# Supplementary material
Source: publisher figshare collection journal article supplement (https://gsapubs.figshare.com/articles/dataset/_/12340409)
Supplement: Supplementary file 1 [file 1]

|                  | PM1                                                                                | PM2                                                                                | PM4                                                                                 | WR1                                                                                  | WR3                                                                                  | MD                                                                                   |
|------------------|------------------------------------------------------------------------------------|------------------------------------------------------------------------------------|-------------------------------------------------------------------------------------|--------------------------------------------------------------------------------------|--------------------------------------------------------------------------------------|--------------------------------------------------------------------------------------|
|                  | FOV = 22 mm<br>Inter-slice = 56.6 $\mu$ m                                          | FOV = 34.2 mm<br>Inter-slice = 74.4 $\mu$ m                                        | FOV = 46 mm<br>Inter-slice = 53.4 $\mu$ m                                           | FOV = 26 mm<br>Inter-slice = 71.9 $\mu$ m                                            | FOV = 26 mm<br>Inter-slice = 71.9 $\mu$ m                                            | FOV = 128 mm<br>Inter-slice = 500 $\mu$ m                                            |
| Slice Data       | 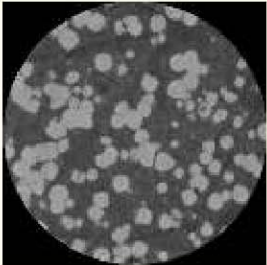  |   |   |   |   |   |
| 3D Visualization |  |  |  |  |  |  |
|                  | Cylinder<br>11.3 mm high<br>22 mm diameter                                         | Block<br>1.9 x 2.5 x 4.6 mm                                                        | Cylinder<br>21.4 mm high<br>46 mm diameter                                          | Cylinder<br>30.2 mm high<br>26 mm diameter                                           | Cylinder<br>28.8 mm high<br>26 mm diameter                                           | Solid<br>~120 mm high<br>~120 mm wide                                                |

FOV = CT image field of view; Inter-slice = Distance between CT slice planes.

3D visualizations made using volume rendering, in which each voxel in a data set is assigned a color and an opacity; the latter allows some parts of the specimens to be made transparent, allowing internal features to be viewed.
